# Supplementary material for: Tryptophan 207 is crucial to the unique properties of the human voltage-gated proton channel, hHV1
Source: PubMed Central journal article supplement — J Gen Physiol. 2015 Nov;146(5):343–56. doi: 10.1085/jgp.201511456 (PMC4621752; doi:10.1085/jgp.201511456), 2015-11
Supplement: supp_jgp.201511456_JGP_201511456_sm.pdf [file supp_jgp.201511456_JGP_201511456_sm.pdf]

Cherny et al., <http://www.jgp.org/cgi/content/full/jgp.201511456/DC1>

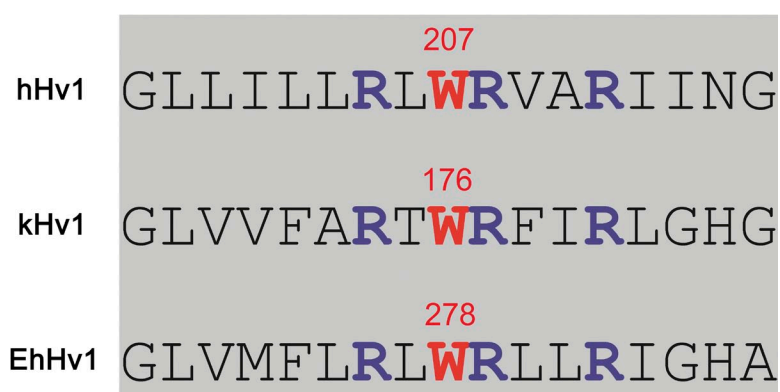

**Figure S1.** Sequence of the S4 segment in hH<sub>v</sub>1, kH<sub>v</sub>1, and EhH<sub>v</sub>1. The signature sequence that defines H<sub>v</sub>1 (together with Asp in the S1 helix) encompasses RxWRxxR. The three species studied are *Homo sapiens* (hH<sub>v</sub>1), *Karlodinium veneficum* (kH<sub>v</sub>1), and *Emiliana huxleyi* (EhH<sub>v</sub>1).

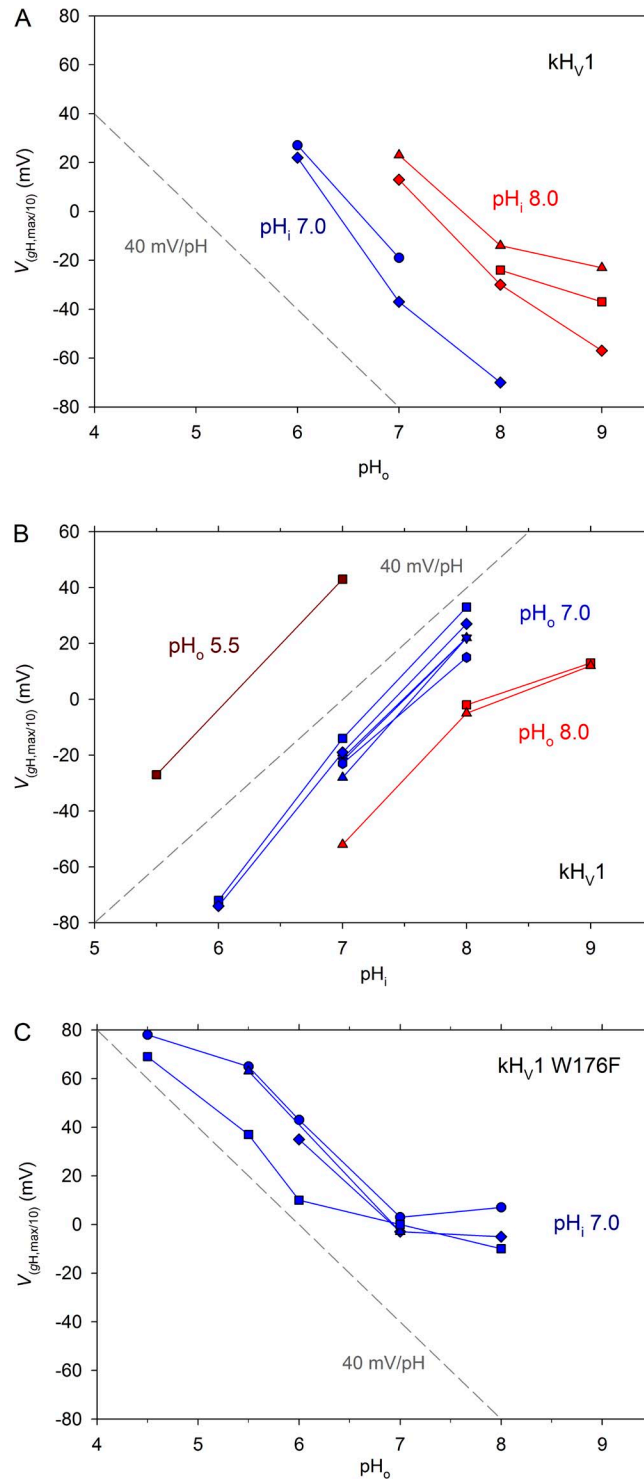

**Figure S2.** Saturation of the  $\Delta pH$  dependence of WT  $kH_v1$  and of W176F mutant of  $kH_v1$ . The voltage at which  $g_H$  is 10% maximal is plotted as a function of  $pH_o$  (A and C) or  $pH_i$  (B), with lines connecting measurements in the same cell. In whole-cell measurements,  $pH_i$  is color coded, as indicated. In inside-out patches,  $pH_o$  is color coded, as indicated. For reference, the dashed gray line in each graph shows the slope of the ubiquitous 40-mV/U  $\Delta pH$  shift in the  $g_H$ - $V$  relationship; the position of this line is arbitrary. C illustrates that saturation occurs at lower  $pH_o$  in W176F.

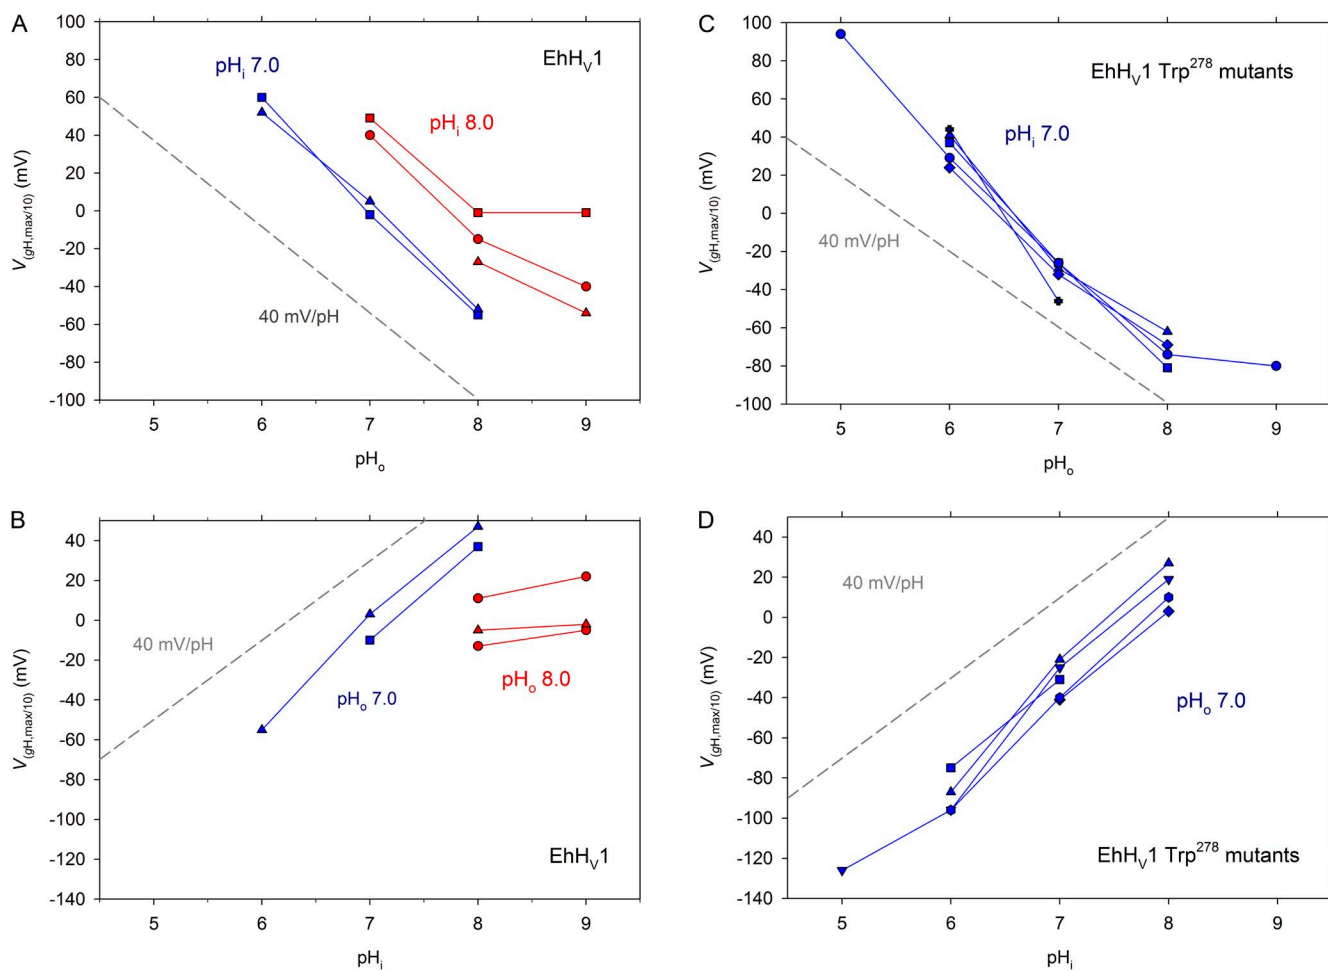

**Figure S3.** Saturation of the  $\Delta pH$  dependence of WT EhH<sub>v</sub>1 and of W278X mutants of EhH<sub>v</sub>1. The voltage at which  $g_{H^+}$  is 10% maximal is plotted as a function of  $pH_o$  (A and C) or  $pH_i$  (B and D), with lines connecting measurements in the same cell. In whole-cell measurements,  $pH_i$  is color coded, as indicated. C includes three W278A, one W278E, and one W278S; D includes one W278A, one W278E, and three W278S. In inside-out patches,  $pH_o$  is color coded, as indicated. For reference, the dashed gray line in each graph shows the slope of the 40-mV/U  $\Delta pH$  shift in the  $g_{H^+}$ - $V$  relationship; the position of this line is arbitrary.
